## Erratum

AARON E. HINKLEY

“HOW ARE WE DEFINING OUR TERMS HERE?”: DEFINING THE MEANING  
OF TERMS IN BIOETHICAL DEBATES

*J Med Philos*, 2008; 33: 533–537; doi:10.1093/jmp/jhn034.

The title of this article was incorrectly cited. The correct title is:

“How Are We Defining Our Terms Here?”: Defining the Meaning of Terms in  
Bioethical Debates.

The publisher regrets this error.
